# Supplementary material for: Probing the ecological and evolutionary history of a thermophilic cyanobacterial population via statistical properties of its microdiversity
Source: PubMed Central journal article supplement (PMC6235289; doi:10.1371/journal.pone.0205396), 2018-11-14
Supplement: pone.0205396.s001.pdf [file pone.0205396.s001.pdf]

| SNP Type                     | Synonymous TDs | Non-synonymous TDs | Amino acid Ds |
|------------------------------|----------------|--------------------|---------------|
| Main Cloud                   |                |                    |               |
| Total                        | 2518           | 1029               | 2202          |
| < 1% freq                    | 936            | 772                | 1566          |
| < 1% freq, one allele        | 777            | 732                | 1481          |
| < 1% freq, one allele, alone | 438            | 514                | 697           |
| Full Data                    |                |                    |               |
| Total                        | 4063           | 1490               | 3086          |
| < 1% freq                    | 1784           | 1077               | 2171          |
| < 1% freq, one allele        | 1186           | 935                | 1861          |
| < 1% freq, one allele, alone | 408            | 589                | 775           |
